# Supplementary figures and images for: High-Level Expression of Alkaline Phosphatase by Adeno-Associated Virus Vector Ameliorates Pathological Bone Structure in a Hypophosphatasia Mouse Model
Source: Springer Nature journal article supplement (doi:10.1007/s00223-020-00676-5), 2020-02-19

**Fig. S1.**

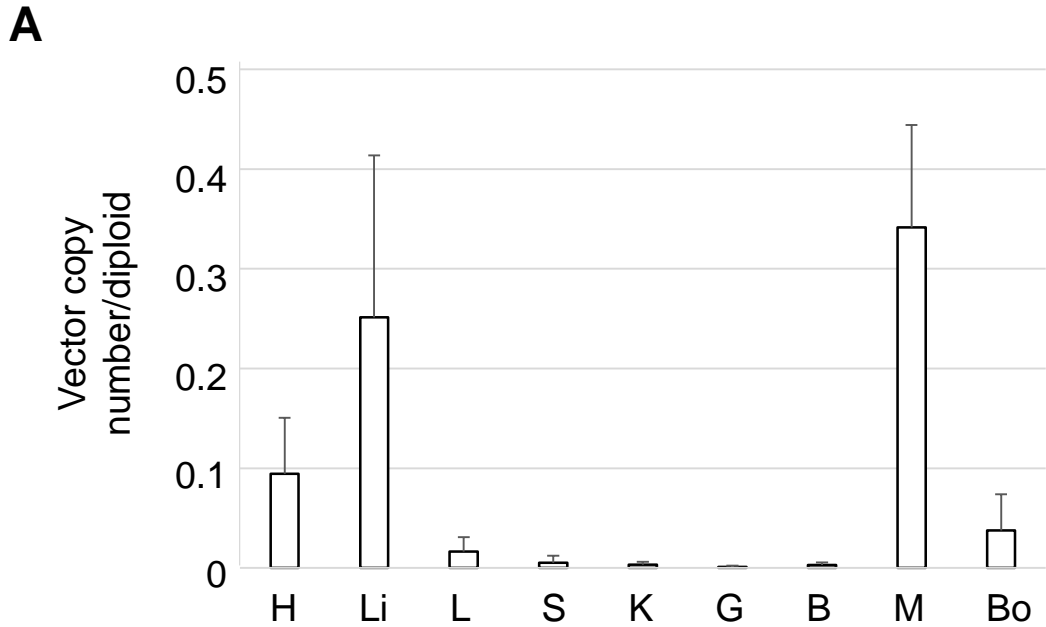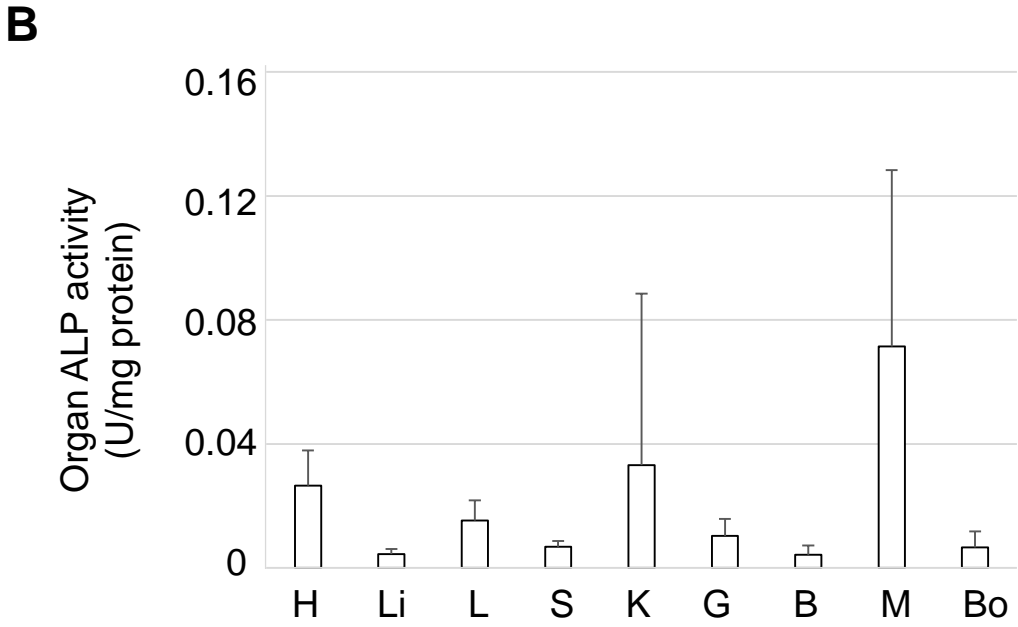

Supplement: MOESM1 [file 17724124]
